# Supplementary material for: Left Atrial Appendage Pseudothrombus Is Associated With Stroke History in Patients With Atrial Fibrillation Undergoing Cardiac Computed Tomography
Source: PubMed Central journal article supplement — J Am Heart Assoc. 2024 Jun 6;13(13):e030147. doi: 10.1161/JAHA.123.030147 (PMC11255678; doi:10.1161/jaha.123.030147), 2024-06-06
Supplement: JAH3-13-e030147-s001.pdf [file JAH3-13-e030147-s001.pdf]

# **SUPPLEMENTAL MATERIAL**

**Table S1. Univariable and multivariable analyses of thromboembolic stroke.**

| Variable                       | Univariable         |        | Multivariable       |       |
|--------------------------------|---------------------|--------|---------------------|-------|
|                                | Odds ratio (95% CI) | P      | Odds ratio (95% CI) | P     |
| <b>Pseudo-thrombosis</b>       | 4.10 (1.93, 8.69)   | <0.001 | 3.03 (1.26, 7.29)   | 0.01  |
| <b>Age (years)</b>             | 1.10 (1.05, 1.16)   | <0.001 | 1.02 (0.95, 1.08)   | 0.66  |
| <b>Female</b>                  | 0.66 (0.28, 1.55)   | 0.34   |                     |       |
| <b>Hypertension</b>            | 1.36 (0.66, 2.81)   | 0.41   |                     |       |
| <b>Diabetes Mellitus</b>       | 0.61 (0.20, 1.86)   | 0.39   |                     |       |
| <b>Dyslipidaemia</b>           | 1.94 (0.87, 4.34)   | 0.11   |                     |       |
| <b>Coronary Artery Disease</b> | 1.09 (0.46, 2.60)   | 0.84   |                     |       |
| <b>Heart Failure</b>           | 0.91 (0.35, 2.37)   | 0.85   |                     |       |
| <b>Vascular Disease</b>        | 3.17 (1.16, 8.65)   | 0.02   | 1.95 (0.56, 6.78)   | 0.29  |
| <b>AADs prior to CT scan</b>   | 0.92 (0.44, 1.91)   | 0.82   |                     |       |
| <b>OAC prior to CT scan</b>    | 0.36 (0.16, 0.82)   | 0.01   | 0.28 (0.11, 0.73)   | 0.009 |
| <b>CHA2DS2-VASc score</b>      | 2.08 (1.58, 2.74)   | <0.001 | 2.00 (1.33, 2.98)   | 0.001 |

  

| LAA characteristics**                               | Univariable         |      |
|-----------------------------------------------------|---------------------|------|
|                                                     | Odds ratio (95% CI) | P    |
| <b>LAA Gradient (initial scan)</b>                  |                     | 0.77 |
| <0.07                                               | 1.05 (0.46, 2.37)   |      |
| 0.07 to 1.3                                         | 0.25 (0.07, 0.88)   |      |
| 1.3+                                                | Reference group     |      |
| <b>LAA Gradient (delayed scan)</b>                  |                     | 0.40 |
| <-0.5                                               | 0.53 (0.18, 1.51)   |      |
| -0.5 to 0.12                                        | 1.56 (0.68, 3.54)   |      |
| 0.12+                                               | Reference group     |      |
| <b>Initial: late pass contrast ratio</b>            |                     | 0.60 |
| <-3                                                 | 1.61 (0.65, 3.95)   |      |
| -3 to 4                                             | Reference group     |      |
| 4+                                                  | 2.02 (0.85, 4.80)   |      |
| <b>LAA Ostium area&gt;3.5</b>                       | 3.03 (1.02, 9.02)   | 0.05 |
| <b>LAA Curved Length</b>                            | 1.01 (0.98, 1.03)   | 0.56 |
| <b>LAA Ostium Area:Curved Length Ratio&gt;0.068</b> | 6.45 (1.49, 27.87)  | 0.01 |
| <b>LAA Volume&gt;11mm<sup>3</sup></b>               | 2.10 (0.98, 4.47)   | 0.06 |
| <b>Tortuosity Index</b>                             | 0.80 (0.32, 2.03)   | 0.64 |
| <b>LAA Morphology</b>                               |                     | 0.20 |
| Chicken wing                                        | 0.89 (0.31, 2.53)   |      |
| Windsock                                            | Reference group     |      |
| Cactus                                              | 0.27 (0.03, 2.13)   |      |
| Cauliflower                                         | 4.31 (1.22, 15.25)  |      |

\* Forced into multivariable model due to known association with stroke. \*\* LAA characteristics were not considered as potential confounders and thus were included in univariable analysis only.

AAD: Anti-arrhythmic drugs OAC: Oral Anticoagulant LA: Left Atrium LAA: Left Atrial Appendage

**Table S2. Univariable and multivariable analyses of TIA.**

| Variable                | Univariable         |        | Multivariable       |      |
|-------------------------|---------------------|--------|---------------------|------|
|                         | Odds ratio (95% CI) | P      | Odds ratio (95% CI) | P    |
| Pseudo-thrombosis       | 1.36 (0.57, 3.22)   | 0.49   | 1.06 (0.42, 2.69)   | 0.90 |
| Age (years)             | 1.06 (1.02, 1.11)   | 0.009  | 1.02 (0.96, 1.08)   | 0.63 |
| Female                  | 1.00 (0.41, 2.43)   | 0.99   |                     |      |
| Hypertension            | 1.42 (0.63, 3.20)   | 0.39   |                     |      |
| Diabetes Mellitus       | 1.18 (0.41, 3.37)   | 0.75   |                     |      |
| Dyslipidaemia           | 1.36 (0.54, 3.46)   | 0.51   |                     |      |
| Coronary Artery Disease | 2.01 (0.84, 4.84)   | 0.12   |                     |      |
| Heart Failure           | 1.02 (0.36, 2.87)   | 0.98   |                     |      |
| Vascular Disease        | 2.59 (0.86, 7.82)   | 0.09   |                     |      |
| AAD prior to CT scan    | 1.40 (0.62, 3.13)   | 0.42   |                     |      |
| OAC prior to CT scan    | 2.30 (1.00, 5.30)   | 0.05   | 2.39 (0.99, 5.79)   | 0.05 |
| CHA2DS2-VASc score      | 1.61 (1.24, 2.08)   | <0.001 | 1.51 (1.07, 2.13)   | 0.02 |

  

| LAA characteristics**                               | Univariable         |      |
|-----------------------------------------------------|---------------------|------|
|                                                     | Odds ratio (95% CI) | P    |
| <b>LAA Gradient (initial scan)</b>                  |                     | 0.75 |
| <0.07                                               | 0.83 (0.30, 2.30)   |      |
| 0.07 to 1.3                                         | 1.03 (0.39, 2.74)   |      |
| 1.3+                                                | Reference group     |      |
| <b>LAA Gradient (delayed scan)</b>                  |                     | 0.79 |
| <-0.5                                               | 1.12 (0.42, 3.01)   |      |
| -0.5 to 0.12                                        | 1.17 (0.44, 3.15)   |      |
| 0.12+                                               | Reference group     |      |
| <b>Initial: late pass contrast ratio</b>            |                     | 0.77 |
| <-3                                                 | 0.97 (0.37, 2.56)   |      |
| -3 to 4                                             | Reference group     |      |
| 4+                                                  | 0.81 (0.29, 2.25)   |      |
| <b>LAA Ostium area&gt;3.5</b>                       | 1.57 (0.57, 4.38)   | 0.39 |
| <b>LAA Curved Length</b>                            | 0.98 (0.95, 1.01)   | 0.19 |
| <b>LAA Ostium Area:Curved Length Ratio&gt;0.068</b> | 4.60 (1.05, 20.11)  | 0.04 |
| <b>LAA Volume&gt;11mm<sup>3</sup></b>               | 1.25 (0.56, 2.81)   | 0.59 |
| <b>Tortuosity Index</b>                             | 0.63 (0.20, 1.92)   | 0.41 |
| <b>LAA Morphology</b>                               |                     | 0.23 |
| Chicken wing                                        | 0.66 (0.18, 2.36)   |      |
| Windsock                                            | Reference group     |      |
| Cactus                                              | 0.75 (0.16, 3.51)   |      |
| Cauliflower                                         | 2.55 (0.62, 10.45)  |      |

\* Forced into multivariable model due to known association with stroke. \*\* LAA characteristics were not considered as potential confounders and thus were included in univariable analysis only.

AAD: Anti-arrhythmic drugs OAC: Oral Anticoagulant LA: Left Atrium LAA: Left Atrial Appendage
